# Supplementary material
Source: Springer Nature journal article supplement (https://www.springermedizin.de/resource/supplementary/12874_2007_280_MOESM1_ESM.pdf/9434144)
Supplement: MOESM1 [file 9434144]

Project Edit Codes Memos Attributes TextSearch Analysis Windows MAXDicto ?

DOT implementation(By doctors)Home visit

Document System

Text Group

Patient

1M-XS-Y-I-???-???(?) 412

2F-JLP-Y-I-????????(?) 437

3F-JLP-Y-I-????????23?? 18

4F-RC-M-I-????????(48) 16

5F-RC-O-I-????????(?) 5

6F-RC-O-I-????-???(?) 8

7F-RC-O-R-????????(???) 12

8F-WZ-O-R 27

6

5

Code System

Code System

Personal background 0

Knowledge 2

Health seeking pathway 8

Delay in seeking health service and causes 0

Delay in diagnosis 8

Attitude to DOT 0

Positive 14

Negative 24

No necessary 3

Lack of incentive / punishing system 17

Time/distance constrain and he... 8

Other issues 14

Attitude to family DOT 10

Positive 0

Negative 16

Attitude to DOT by private doctor o... 3

DOT implementation 9

Patient own 34

By family members 27

By doctors 11

Home visit 16

By telephone 9

5

Text Browser: Patient\27M-WZ-Y-I-???(?)

Interview transcripts

Transcript showing coded segments

Code system

..Knowledge

..Adherence

..Reasons of ..The extent

..Examinations

..Drugs cost

54 Y: 那你治疗要多长时间呢? 医生有没有给你说?

55 ---要6个月。

56 Y: 按时间推算, 你的治疗时间应该是到了是不是?

57 ---是的。

58 Y: 那你现在为啥子还在吃药呢? 你中途有没有断过药?

59 ---没有断过药, 但我觉得6个月到了呀, 还应该加固一、二个月很可能, 那个效果要好一些; 但是有些6个月, 它不一定能够根治。

60 Y: 吃6个月药是医生建议的, 那加固2个月是你自己的意见, 是不是?

61 ---嗯。

62 Y: 为什么你想加固2个月呢? 是不是觉得多服两个月的药效果要好些?

63 ---嗯。

64 Y: 你刚才说你去结防所拿药已4次了, 花了好多钱了?

65 ---几十块钱嘛。

66 Y: 那几十块钱包括些啥子费用呢?

67 ---照片三, 主要是照片三。

68 Y: 拿药那些花钱没的?

69 ---没有。

70 Y: 你吃了药之后 现在觉得好点不?

OR-Combination
